# Supplementary material for: Lorca y la canción popular. Las tres hojas: de la tradición al surrealismo
Source: MDPI journal article supplement (doi:10.3390/ijerph18189809), 2008-01-01
Supplement: s1 [file s1]

Supplementary Table S1: Values of the Krippendorff's alpha for the test–retest–reliability ( $n = 29$ ).

| Variable                                                             | Scale    | Krippendorff's alpha  |                                     |
|----------------------------------------------------------------------|----------|-----------------------|-------------------------------------|
|                                                                      |          | <i>Point estimate</i> | <i>Bootstrap 95%–CI<sup>1</sup></i> |
| <i>Taking up &amp; terminating LTPA in life course</i>               |          |                       |                                     |
| First time taking up LTPA in life course (age)                       | ratio    | .81                   | .72 – .89                           |
| Interruption(s) of LTPA in life course (yes/no)                      | nominal  | .90                   | .70 – 1.00                          |
| Number of interruptions of LTPA in life course                       | ratio    | .88                   | .67 – 1.00                          |
| Timing of interruptions of LTPA in life course (age)                 | ratio    | .98                   | .94 – 1.00                          |
| <i>Life events from the familial life domain (last 15 years)</i>     |          |                       |                                     |
| Number of past relationships                                         | ratio    | .90                   | .77 – 1.00                          |
| Timing of relationships (start & end; age)                           | ratio    | .99                   | .99 – 1.00                          |
| Number of children                                                   | ratio    | 1.00                  | –                                   |
| Birth year of children                                               | interval | 1.00                  | –                                   |
| <i>Life events from the occupational life domain (last 15 years)</i> |          |                       |                                     |
| Number of the vocational trainings                                   | ratio    | .92                   | .77 – 1.00                          |
| Timing of vocational trainings (start & end; age)                    | ratio    | .99                   | .99 – 1.00                          |
| Number of jobs                                                       | ratio    | .96                   | .91 – 1.00                          |
| Timing of jobs (start & end; age)                                    | ratio    | .99                   | .96 – 1.00                          |
| Timing of retirement (age)                                           | ratio    | .98                   | .93 – 1.00                          |

Note: Krippendorff's alpha is for a nominal scale similar to Scott's Pi and for an interval scale similar to Pearson et al.'s intraclass–correlation coefficient (see Hayes & Krippendorff, 2007 for further information).

<sup>1</sup>As suggested (Hayes & Krippendorff, 2007), 10'000 bootstrap sampling distributions were done (CI = confidence interval).

Supplementary Table S2: Multilevel discrete–time event–history analysis for **starting a relationship on taking up LTPA**. The model presented is calculated without interaction effects for the life event with gender and/or age groups, because this does not improve model fit.

| Fixed effects                         | logit    | SE   | z value | P      |
|---------------------------------------|----------|------|---------|--------|
| Intercept                             | –1.19    | 0.53 | –2.26   | .02    |
| Starting a relationship (12–72 years) | 0.64     | 0.51 | 1.25    | .21    |
| <i>Control variables</i>              |          |      |         |        |
| Sex (0 = male; 1 = female)            | 0.16     | 0.32 | .51     | .61    |
| Level of education (1–5)              | –0.09    | 0.13 | –0.65   | .52    |
| Previous inactivity duration (1–15)   | 0.19     | 0.08 | 2.33    | .02    |
| Quotient active years                 | 6.43     | 1.68 | 3.82    | < .001 |
| age group (ref. = 1; <30 y.)          |          |      |         |        |
| age group 2 (30–44 y.)                | –0.71    | 0.52 | –1.37   | .17    |
| age group 3 (45–59 y.)                | –2.31    | 0.61 | –3.81   | < .001 |
| age group 4 (60–72 y.)                | –2.20    | 0.58 | –3.77   | < .001 |
| Time (ref. = 8)                       |          |      |         |        |
| Time 1                                | –1.41    | 0.80 | –1.76   | .08    |
| Time 2                                | –0.29    | 0.66 | –0.43   | .67    |
| Time 3                                | –0.73    | 0.75 | –0.98   | .33    |
| Time 4                                | –0.25    | 0.67 | –0.38   | .71    |
| Time 5                                | –0.41    | 0.70 | –0.58   | .56    |
| Time 6                                | 0.24     | 0.64 | 0.38    | .70    |
| Time 7                                | –1.01    | 0.76 | –1.33   | .18    |
| Time 9                                | 0.89     | 0.57 | 1.57    | .12    |
| Time 10                               | –1.58    | 0.90 | –1.76   | .08    |
| Time 11                               | –0.03    | 0.63 | –0.05   | .96    |
| Time 12                               | 1.04     | 0.58 | 1.80    | .07    |
| Time 13                               | 0.81     | 0.64 | 1.26    | .21    |
| Time 14                               | 0.90     | 0.69 | 1.29    | .20    |
| Time 15                               | 0.75     | 0.70 | 1.07    | .29    |
| Time 16                               | 2.37     | 0.76 | 3.10    | .002   |
| Random effects                        | Variance | SD   |         |        |
| Person                                | 0.93     | 0.96 |         |        |

Note:  $N = 804$  observations,  $n = 152$  persons; SE = standard error, SD = standard deviation.

Supplementary Table S3: Multilevel discrete–time event–history analysis for **ending a relationship on taking up LTPA**. The model presented is calculated without interaction effects for the life event with gender and/or age groups, because this does not improve model fit.

| Fixed effects                       |                        | logit           | SE   | z value   | P      |
|-------------------------------------|------------------------|-----------------|------|-----------|--------|
| Intercept                           |                        | –1.81           | 0.40 | –4.50     | < .001 |
| Ending a relationship (12–72 years) |                        | 1.31            | 0.44 | 3.00      | .003   |
| <i>Control variables</i>            |                        |                 |      |           |        |
| Sex (0 = male; 1 = female)          |                        | –0.14           | 0.17 | –0.81     | .42    |
| Level of education (1–5)            |                        | 0.11            | 0.06 | 1.73      | .08    |
| Previous inactivity duration (1–15) |                        | –0.04           | 0.02 | –1.97     | .05    |
| Quotient active years               |                        | 1.85            | 0.43 | 4.33      | < .001 |
| age group (ref. = 1; <30 y.)        |                        |                 |      |           |        |
|                                     | age group 2 (30–44 y.) | 0.31            | 0.27 | 1.15      | .25    |
|                                     | age group 3 (45–59 y.) | –0.28           | 0.28 | –1.00     | .25    |
|                                     | age group 4 (60–72 y.) | –0.47           | 0.33 | –1.42     | .16    |
| Time (ref. = 8)                     |                        |                 |      |           |        |
|                                     | Time 1                 | –0.55           | 0.42 | –1.32     | .19    |
|                                     | Time 2                 | –0.19           | 0.39 | –0.48     | .63    |
|                                     | Time 3                 | –0.24           | 0.41 | –0.60     | .55    |
|                                     | Time 4                 | –0.76           | 0.44 | –1.72     | .09    |
|                                     | Time 5                 | –0.03           | 0.40 | –0.08     | .93    |
|                                     | Time 6                 | –0.26           | 0.42 | –0.62     | .54    |
|                                     | Time 7                 | –0.32           | 0.42 | –0.77     | .44    |
|                                     | Time 9                 | 0.07            | 0.41 | 0.17      | .86    |
|                                     | Time 10                | 0.31            | 0.41 | 0.75      | .45    |
|                                     | Time 11                | 0.64            | 0.40 | 1.62      | .11    |
|                                     | Time 12                | 0.08            | 0.43 | 0.19      | .85    |
|                                     | Time 13                | 0.45            | 0.42 | 1.06      | .29    |
|                                     | Time 14                | 0.32            | 0.43 | 0.73      | .46    |
|                                     | Time 15                | 1.30            | 0.42 | 3.07      | .002   |
|                                     | Time 16                | 1.81            | 0.50 | 3.66      | < .001 |
| Random effects                      |                        | <i>Variance</i> |      | <i>SD</i> |        |
| Person                              |                        | 0.05            | 0.23 |           |        |

Note:  $N = 1586$  observations,  $n = 264$  persons; SE = standard error, SD = standard deviation.

Supplementary Table S4: Multilevel discrete-time event-history analysis for **becoming a parent on taking up LTPA**. The model presented is calculated without interaction effects for the life event with gender and/or age groups, because this does not improve model fit.

| Fixed effects                       | logit    | SE   | z value | P      |
|-------------------------------------|----------|------|---------|--------|
| Intercept                           | −1.41    | 0.34 | −4.14   | < .001 |
| Becoming a parent (15–54 years)     | −1.06    | 0.45 | 2.34    | .02    |
| <i>Control variables</i>            |          |      |         |        |
| Sex (0 = male; 1 = female)          | −0.21    | 0.17 | −1.23   | .22    |
| Level of education (1–5)            | 0.06     | 0.07 | 0.84    | .40    |
| Previous inactivity duration (1–15) | 0.01     | 0.02 | 0.07    | .95    |
| Quotient active years               | 2.07     | 0.47 | 4.36    | < .001 |
| age group (ref. = 1; <30 y.)        |          |      |         |        |
| age group 2 (30–44 y.)              | 0.17     | 0.20 | 0.85    | .40    |
| age group 3 (45–54 y.)              | −0.57    | 0.23 | −2.54   | .01    |
| Time (ref. = 8)                     |          |      |         |        |
| Time 1                              | −0.53    | 0.41 | −1.31   | .19    |
| Time 2                              | −0.18    | 0.39 | −0.46   | .65    |
| Time 3                              | −0.42    | 0.42 | −1.01   | .31    |
| Time 4                              | −0.55    | 0.42 | −1.29   | .20    |
| Time 5                              | 0.26     | 0.38 | 0.68    | .49    |
| Time 6                              | −0.15    | 0.42 | −0.35   | .73    |
| Time 7                              | −0.46    | 0.45 | −1.02   | .31    |
| Time 9                              | 0.56     | 0.39 | 1.42    | .16    |
| Time 10                             | −0.14    | 0.45 | −0.31   | .75    |
| Time 11                             | 0.75     | 0.41 | 1.84    | .07    |
| Time 12                             | 0.59     | 0.42 | 1.41    | .16    |
| Time 13                             | 0.70     | 0.43 | 1.63    | .10    |
| Time 14                             | 0.53     | 0.45 | 1.19    | .23    |
| Time 15                             | 1.56     | 0.46 | 3.41    | < .001 |
| Time 16                             | 3.37     | 0.74 | 4.55    | < .001 |
| Random effects                      | Variance | SD   |         |        |
| Person                              | 0.08     | 0.29 |         |        |

Note:  $N = 1391$  observations,  $n = 280$  persons; SE = standard error, SD = standard deviation.

Supplementary Table S5: Multilevel discrete-time event-history analysis for **starting vocational training on taking up LTPA**. The model presented is calculated without interaction effects for the life event with gender and/or age groups, because this does not improve model fit.

| Fixed effects                              | logit    | SE   | z value | P      |
|--------------------------------------------|----------|------|---------|--------|
| Intercept                                  | 4.77     | 1.83 | 2.60    | .01    |
| Starting vocational training (15–44 years) | –0.05    | 0.46 | –0.11   | .91    |
| <i>Control variables</i>                   |          |      |         |        |
| Sex (0 = male; 1 = female)                 | –0.28    | 0.23 | –1.20   | .23    |
| Level of education (1–5)                   | 0.02     | 0.09 | 0.22    | .82    |
| Previous inactivity duration (1–15)        | <0.01    | 0.03 | 0.05    | .96    |
| Quotient active years                      | 2.34     | 0.61 | 3.84    | < .001 |
| age group (ref. = 1; <30 y.)               |          |      |         |        |
| age group 2 (30–44 y.)                     | 0.16     | 0.24 | 0.67    | .50    |
| Time (ref. = 8)                            |          |      |         |        |
| Time 1                                     | –0.33    | 0.57 | –0.58   | .56    |
| Time 2                                     | 0.18     | 0.55 | 0.33    | .74    |
| Time 3                                     | –0.33    | 0.60 | –0.56   | .58    |
| Time 4                                     | –0.47    | 0.61 | –0.77   | .44    |
| Time 5                                     | 0.66     | 0.55 | 1.20    | .23    |
| Time 6                                     | 0.45     | 0.58 | 0.78    | .44    |
| Time 7                                     | 0.07     | 0.62 | 0.11    | .91    |
| Time 9                                     | 0.92     | 0.58 | 1.59    | .11    |
| Time 10                                    | –0.44    | 0.71 | –0.61   | .54    |
| Time 11                                    | 0.73     | 0.60 | 1.22    | .22    |
| Time 12                                    | 0.94     | 0.61 | 1.54    | .12    |
| Time 13                                    | 0.96     | 0.64 | 1.48    | .14    |
| Time 14                                    | 1.50     | 0.64 | 2.33    | .02    |
| Time 15                                    | 1.52     | 0.67 | 2.27    | .02    |
| Time 16                                    | 3.55     | 0.95 | 3.74    | < .001 |
| Random effects                             | Variance | SD   |         |        |
| Person                                     | 0.11     | 0.33 |         |        |

Note:  $N = 759$  observations,  $n = 183$  persons; SE = standard error, SD = standard deviation.

Supplementary Table S6: Multilevel discrete-time event-history analysis for **starting a job on taking up LTPA**. The model presented is calculated without interaction effects for the life event with gender and/or age groups, because this does not improve model fit.

| Fixed effects                       | logit    | SE   | z value | P      |
|-------------------------------------|----------|------|---------|--------|
| Intercept                           | 4.44     | 1.18 | 3.77    | < .001 |
| Starting a job (15–70 years)        | 0.12     | 0.25 | 0.48    | .63    |
| <i>Control variables</i>            |          |      |         |        |
| Sex (0 = male; 1 = female)          | −0.13    | 0.15 | −0.86   | .39    |
| Level of education (1–5)            | 0.05     | 0.06 | 0.90    | .37    |
| Previous inactivity duration (1–15) | −0.02    | 0.02 | −0.93   | .35    |
| Quotient active years               | 2.11     | 0.40 | 5.35    | < .001 |
| age group (ref. = 1; <30 y.)        |          |      |         |        |
| age group 2 (30–44 y.)              | 0.07     | 0.19 | 0.34    | .73    |
| age group 3 (45–59 y.)              | −0.61    | 0.20 | −2.99   | .003   |
| age group 4 (60–70 y.)              | −0.78    | 0.28 | −2.79   | .005   |
| Time (ref. = 8)                     |          |      |         |        |
| Time 1                              | −0.67    | 0.38 | −1.77   | .08    |
| Time 2                              | −0.35    | 0.35 | −1.00   | .32    |
| Time 3                              | −0.27    | 0.36 | −0.75   | .45    |
| Time 4                              | −0.61    | 0.38 | −1.62   | .11    |
| Time 5                              | −0.06    | 0.35 | −0.19   | .85    |
| Time 6                              | −0.10    | 0.36 | −0.29   | .77    |
| Time 7                              | −0.50    | 0.39 | −1.28   | .20    |
| Time 9                              | 0.58     | 0.34 | 1.71    | .09    |
| Time 10                             | 0.02     | 0.38 | 0.06    | .95    |
| Time 11                             | 0.52     | 0.36 | 1.47    | .14    |
| Time 12                             | 0.52     | 0.36 | 1.45    | .15    |
| Time 13                             | 0.49     | 0.37 | 1.33    | .18    |
| Time 14                             | 0.34     | 0.39 | 0.88    | .38    |
| Time 15                             | 1.28     | 0.37 | 3.41    | < .001 |
| Time 16                             | 2.19     | 0.45 | 4.90    | < .001 |
| Random effects                      | Variance | SD   |         |        |
| Person                              | 0.06     | 0.24 |         |        |

Note:  $N = 2025$  observations,  $n = 342$  persons; SE = standard error, SD = standard deviation.

Supplementary Table S7: Multilevel discrete-time event-history analysis for **ending a job on taking up LTPA**. The model presented is calculated without interaction effects for the life event with gender and/or age groups, because this does not improve model fit.

| Fixed effects                       |                        | logit           | SE   | z value   | P      |
|-------------------------------------|------------------------|-----------------|------|-----------|--------|
| Intercept                           |                        | 4.97            | 1.20 | 4.15      | < .001 |
| Ending a job (15–70 years)          |                        | 0.17            | 0.27 | 0.61      | .54    |
| <i>Control variables</i>            |                        |                 |      |           |        |
| Sex (0 = male; 1 = female)          |                        | −0.12           | 0.15 | −0.79     | .43    |
| Level of education (1–5)            |                        | 0.05            | 0.06 | 0.87      | .38    |
| Previous inactivity duration (1–15) |                        | −0.01           | 0.02 | −0.66     | .51    |
| Quotient active years               |                        | 2.28            | 0.40 | 5.67      | < .001 |
| age group (ref. = 1; <30 y.)        |                        |                 |      |           |        |
|                                     | age group 2 (30–44 y.) | 0.05            | 0.19 | 0.24      | .81    |
|                                     | age group 3 (45–59 y.) | −0.65           | 0.29 | −3.21     | .001   |
|                                     | age group 4 (60–70 y.) | −1.08           | 0.30 | −3.57     | < .001 |
| Time (ref. = 8)                     |                        |                 |      |           |        |
|                                     | Time 1                 | −0.70           | 0.38 | −1.85     | .06    |
|                                     | Time 2                 | −0.39           | 0.36 | −1.09     | .28    |
|                                     | Time 3                 | −0.36           | 0.36 | −1.00     | .32    |
|                                     | Time 4                 | −0.64           | 0.38 | −1.68     | .09    |
|                                     | Time 5                 | −0.08           | 0.35 | −0.23     | .82    |
|                                     | Time 6                 | −0.18           | 0.37 | −0.48     | .63    |
|                                     | Time 7                 | −0.57           | 0.40 | −1.45     | .15    |
|                                     | Time 9                 | 0.43            | 0.35 | 1.22      | .22    |
|                                     | Time 10                | −0.01           | 0.38 | −0.03     | .98    |
|                                     | Time 11                | 0.50            | 0.36 | 1.40      | .16    |
|                                     | Time 12                | 0.39            | 0.37 | 1.05      | .29    |
|                                     | Time 13                | 0.49            | 0.37 | 1.30      | .19    |
|                                     | Time 14                | 0.34            | 0.39 | 0.85      | .39    |
|                                     | Time 15                | 1.30            | 0.38 | 3.43      | < .001 |
|                                     | Time 16                | 2.16            | 0.45 | 4.78      | < .001 |
| Random effects                      |                        | <i>Variance</i> |      | <i>SD</i> |        |
| Person                              |                        | 0.66            | 0.81 |           |        |

Note:  $N = 1995$  observations,  $n = 342$  persons; SE = standard error, SD = standard deviation.

Supplementary Table S8: Multilevel discrete-time event-history analysis for **retirement on taking up LTPA**. The model presented is calculated without interaction effects for the life event with gender and/or age groups, because this does not improve model fit.

| Fixed effects                       | logit    | SE   | z value | P      |
|-------------------------------------|----------|------|---------|--------|
| Intercept                           | 2.21     | 1.90 | 1.16    | .25    |
| Retirement (50–72 years)            | 1.49     | 0.44 | 3.39    | < .001 |
| <i>Control variables</i>            |          |      |         |        |
| Sex (0 = male; 1 = female)          | −0.02    | 0.25 | −0.09   | .93    |
| Level of education (1–5)            | 0.12     | 0.10 | 1.32    | .19    |
| Previous inactivity duration (1–15) | −0.08    | 0.04 | −2.22   | .03    |
| Quotient active years               | 1.42     | 0.70 | 2.04    | .04    |
| age group (ref. = 1; 50–59 y.)      |          |      |         |        |
| age group 4 (60–72 y.)              | −0.17    | 0.29 | −0.58   | .60    |
| Time (ref. = 8)                     |          |      |         |        |
| Time 1                              | −0.91    | 0.71 | −1.27   | .20    |
| Time 2                              | −0.93    | 0.71 | −1.31   | .19    |
| Time 3                              | −0.17    | 0.54 | −0.31   | .76    |
| Time 4                              | −0.22    | 0.55 | −0.39   | .70    |
| Time 5                              | −1.57    | 0.82 | −1.92   | .05    |
| Time 6                              | −0.71    | 0.58 | −1.23   | .22    |
| Time 7                              | −1.41    | 0.65 | −2.18   | .03    |
| Time 9                              | 0.27     | 0.50 | 0.54    | .59    |
| Time 10                             | 0.36     | 0.52 | 0.70    | .48    |
| Time 11                             | 0.01     | 0.55 | 0.02    | .99    |
| Time 12                             | −0.06    | 0.55 | −0.11   | .91    |
| Time 13                             | −0.31    | 0.60 | −0.52   | .60    |
| Time 14                             | −0.30    | 0.62 | −0.48   | .63    |
| Time 15                             | 0.49     | 0.54 | 0.90    | .37    |
| Time 16                             | 1.59     | 0.60 | 2.63    | .009   |
| Random effects                      | Variance | SD   |         |        |
| Person                              | 0.12     | 0.36 |         |        |

Note:  $N = 935$  observations,  $n = 165$  persons; SE = standard error, SD = standard deviation.

Supplementary Table S9: Multilevel discrete–time event–history analysis for **simultaneously occurring life events on taking up LTPA**. The model presented due to the best fit is calculated with the interaction effects for simultaneously occurred life events × age group, whereas the interaction with sex does not improve model fit.

| Fixed effects                                                 | logit | SE   | z value | P      |
|---------------------------------------------------------------|-------|------|---------|--------|
| Intercept                                                     | 5.57  | 1.16 | 4.79    | < .001 |
| Simul. occurring life events (15–70 years)                    |       |      |         |        |
| Simul. occurring life events × age group (ref. = 1; <30 y.)   | −0.15 | 0.19 | −0.79   | .43    |
| age group 2 (30–44 y.)                                        | 0.21  | 0.26 | 0.81    | .42    |
| age group 3 (45–59 y.)                                        | 0.67  | 0.29 | 2.29    | .02    |
| age group 4 (60–70 y.)                                        | 1.20  | 0.42 | 2.88    | .004   |
| <i>changing reference category<sup>1</sup></i>                |       |      |         |        |
| Simul. occurring life events × age group (ref. = 2; 30–44 y.) | 0.06  | 0.18 | 0.33    | .74    |
| Simul. occurring life events × age group (ref. = 3; 45–59 y.) | 0.52  | 0.22 | 2.33    | .02    |
| Simul. occurring life events × age group (ref. = 4; 60–70 y.) | 1.05  | 0.37 | 2.83    | .004   |
| <i>Control variables</i>                                      |       |      |         |        |
| Sex (0 = male; 1 = female)                                    | −0.13 | 0.14 | −0.91   | .36    |
| Level of education (1–5)                                      | 0.04  | 0.05 | 0.71    | .48    |
| Previous inactivity duration (1–15)                           | 0.01  | 0.02 | −0.34   | .74    |
| Quotient active years                                         | 2.44  | 0.39 | 6.23    | < .001 |
| age group (ref. = 1; <30 y.)                                  |       |      |         |        |
| age group 2 (30–44 y.)                                        | −0.04 | 0.22 | −0.19   | .85    |
| age group 3 (45–59 y.)                                        | −0.82 | 0.23 | −3.64   | < .001 |
| age group 4 (60–70 y.)                                        | −1.18 | 0.28 | −4.22   | < .001 |
| Time (ref. = 8)                                               |       |      |         |        |
| Time 1                                                        | −0.84 | 0.37 | −2.24   | .03    |
| Time 2                                                        | −0.38 | 0.34 | −1.11   | .27    |
| Time 3                                                        | −0.36 | 0.35 | −1.02   | .31    |
| Time 4                                                        | −0.70 | 0.37 | −1.89   | .06    |
| Time 5                                                        | −0.23 | 0.35 | −0.65   | .52    |
| Time 6                                                        | −0.26 | 0.35 | −0.72   | .47    |
| Time 7                                                        | −0.51 | 0.37 | −1.39   | .16    |
| Time 9                                                        | 0.41  | 0.33 | 1.24    | .22    |
| Time 10                                                       | −0.09 | 0.37 | −0.24   | .81    |
| Time 11                                                       | 0.41  | 0.34 | 1.21    | .23    |
| Time 12                                                       | 0.37  | 0.35 | 1.07    | .29    |

|                |         |                 |           |      |        |
|----------------|---------|-----------------|-----------|------|--------|
|                | Time 13 | 0.44            | 0.35      | 1.23 | .22    |
|                | Time 14 | 0.25            | 0.37      | 0.69 | .49    |
|                | Time 15 | 1.10            | 0.36      | 3.07 | .002   |
|                | Time 16 | 2.06            | 0.41      | 4.99 | < .001 |
| Random effects |         | <i>Variance</i> | <i>SD</i> |      |        |
| Person         |         | 0.67            | 0.82      |      |        |

Note:  $N = 2149$  observations,  $n = 341$  persons; SE = standard error, SD = standard deviation.

<sup>1</sup>To compare persons with and without experiencing a life event within the age group, the reference category was changed to this age group (Jaccard, 2001). The model and its values stays the same.

Supplementary Table S10: Multilevel discrete-time event-history analysis for **starting a relationship on terminating LTPA**. The model presented is calculated without interaction effects for the life event with gender and/or age groups, because this does not improve model fit.

| Fixed effects                         |                        | logit    | SE   | z value | P      |
|---------------------------------------|------------------------|----------|------|---------|--------|
| Intercept                             |                        | −6.50    | 1.12 | −5.79   | < .001 |
| Starting a relationship (12–72 years) |                        | 0.64     | 0.46 | 1.39    | .16    |
| <i>Control variables</i>              |                        |          |      |         |        |
| Sex (0 = male; 1 = female)            |                        | 0.16     | 0.31 | 0.50    | .62    |
| Level of education (1–5)              |                        | −0.22    | 0.13 | −1.68   | .09    |
| Previous activity duration (1–15)     |                        | 0.07     | 0.07 | 1.07    | .29    |
| Quotient active years                 |                        | −3.58    | 1.33 | −2.69   | .007   |
| age group (ref. = 1; <30 y.)          |                        |          |      |         |        |
|                                       | age group 2 (30–44 y.) | −0.52    | 0.46 | −1.12   | .26    |
|                                       | age group 3 (45–59 y.) | −1.43    | 0.51 | −2.81   | .005   |
|                                       | age group 4 (60–72 y.) | −1.75    | 0.56 | −3.15   | .001   |
| Time (ref. = 8)                       |                        |          |      |         |        |
|                                       | Time 1                 | 1.37     | 1.17 | 1.17    | .24    |
|                                       | Time 2                 | 1.32     | 1.20 | 1.10    | .27    |
|                                       | Time 3                 | 0.84     | 1.26 | 0.67    | .50    |
|                                       | Time 4                 | 1.81     | 1.13 | 1.59    | .11    |
|                                       | Time 5                 | 0.11     | 1.45 | 0.08    | .94    |
|                                       | Time 6                 | 1.93     | 1.12 | 1.73    | .08    |
|                                       | Time 7                 | 1.94     | 1.12 | 1.74    | .08    |
|                                       | Time 9                 | 2.11     | 1.09 | 1.94    | .05    |
|                                       | Time 10                | 1.64     | 1.12 | 1.47    | .14    |
|                                       | Time 11                | 2.06     | 1.09 | 1.88    | .06    |
|                                       | Time 12                | 2.11     | 1.09 | 1.93    | .05    |
|                                       | Time 13                | 1.88     | 1.10 | 1.71    | .09    |
|                                       | Time 14                | 2.22     | 1.09 | 2.03    | .04    |
|                                       | Time 15                | 1.88     | 1.11 | 1.69    | .09    |
| Random effects                        |                        | Variance |      | SD      |        |
| Person                                |                        | 2.47     |      | 1.57    |        |

Note:  $N = 5427$  observations,  $n = 696$  persons; SE = standard error, SD = standard deviation; Time 16 had to be removed from the calculation because there are no terminations there.

Supplementary Table S11: Multilevel discrete–time event–history analysis for **ending a relationship on terminating LTPA**. The model presented due to the best fit is calculated with the interaction effects for ending a relationship × sex, whereas the interaction with age group does not improve model fit.

| Fixed effects                                  | logit           | SE        | z value | P      |
|------------------------------------------------|-----------------|-----------|---------|--------|
| Intercept                                      | −4.60           | 0.46      | −9.97   | < .001 |
| Ending a relationship (12–72 years)            |                 |           |         |        |
| Ending a Relationship × sex (ref. = men)       | 1.71            | 0.57      |         | .003   |
| sex (women)                                    | −2.52           | 1.17      |         | .03    |
| <i>changing reference category<sup>1</sup></i> |                 |           |         |        |
| Ending a Relationship × sex (ref. = women)     | −0.82           | 1.02      | −0.80   | .43    |
| <i>Control variables</i>                       |                 |           |         |        |
| Sex (0 = male; 1 = female)                     | 0.55            | 0.19      | 2.88    | .003   |
| Level of education (1–5)                       | 0.07            | 0.07      | 1.02    | .31    |
| Previous activity duration (1–15)              | −0.10           | 0.03      | −3.90   | < .001 |
| Quotient active years                          | −0.18           | 0.46      | −0.39   | .69    |
| age group (ref. = 1; <30 y.)                   |                 |           |         |        |
| age group 2 (30–44 y.)                         | −0.66           | 0.29      | −2.29   | .02    |
| age group 3 (45–59 y.)                         | −0.92           | 0.28      | −3.24   | .001   |
| age group 4 (60–72 y.)                         | −1.66           | 0.35      | −4.71   | < .001 |
| Time (ref. = 8)                                |                 |           |         |        |
| Time 1                                         | 0.28            | 0.44      | 0.64    | .52    |
| Time 2                                         | −0.02           | 0.47      | −0.05   | .96    |
| Time 3                                         | 0.41            | 0.43      | 0.95    | .34    |
| Time 4                                         | −0.89           | 0.61      | −1.48   | .14    |
| Time 5                                         | 0.14            | 0.46      | 0.31    | .76    |
| Time 6                                         | 0.37            | 0.43      | 0.84    | .40    |
| Time 7                                         | 0.32            | 0.44      | 0.72    | .47    |
| Time 9                                         | −0.57           | 0.56      | −1.01   | .31    |
| Time 10                                        | 0.12            | 0.47      | 0.26    | .80    |
| Time 11                                        | 0.69            | 0.42      | 1.64    | .10    |
| Time 12                                        | 0.22            | 0.46      | 0.48    | .63    |
| Time 13                                        | 0.31            | 0.45      | 0.70    | .49    |
| Time 14                                        | 0.31            | 0.45      | 0.69    | .49    |
| Time 15                                        | 0.06            | 0.48      | 0.13    | .90    |
| Random effects                                 | <i>Variance</i> | <i>SD</i> |         |        |
| Person                                         | 0.44            | 0.66      |         |        |

Note: *N* = 17741 observations, *n* = 1423 persons; SE = standard error, SD = standard deviation; Time 16 had to be removed from the calculation because there are no terminations there.

<sup>1</sup>To compare persons with and without experiencing a life event within the age group, the reference category was changed to this age group (Jaccard, 2001). The model and its values stays the same.

Supplementary Table S12: Multilevel discrete–time event–history analysis for **becoming a parent on terminating LTPA**. The model presented due to the best fit is calculated with the interaction effects for becoming a parent × age group and becoming a parent × sex.

| Fixed effects                                                                                 | logit | SE   | z value | P      |
|-----------------------------------------------------------------------------------------------|-------|------|---------|--------|
| Intercept                                                                                     | −4.48 | 0.41 | −10.89  | < .001 |
| Becoming a parent (15–54 years)                                                               |       |      |         |        |
| Becoming a parent × age group (ref. = 1; <30 y.);<br>Becoming a parent × sex (ref. = men)     | −1.89 | 1.25 |         | .13    |
| age group 2 (30–44 y.)                                                                        | 1.57  | 0.72 |         | .03    |
| age group 3 (45–54 y.)                                                                        | 2.50  | 1.34 |         | .06    |
| sex (women)                                                                                   | 3.15  | 1.09 |         | .004   |
| <i>changing reference category<sup>1</sup></i>                                                |       |      |         |        |
| Becoming a parent × age group (ref. = 1; <30 y.);<br>Becoming a parent × sex (ref. = women)   | 1.26  | 0.66 | 1.92    | .06    |
| Becoming a parent × age group (ref. = 2; 30–44 y.);<br>Becoming a parent × sex (ref. = men)   | −0.31 | 1.08 | −0.29   | .77    |
| Becoming a parent × age group (ref. = 2; 30–44 y.);<br>Becoming a parent × sex (ref. = women) | 2.84  | 0.33 | 8.55    | < .001 |
| Becoming a parent × age group (ref. = 3; 45–54 y.);<br>Becoming a parent × sex (ref. = men)   | 0.61  | 1.35 | 0.45    | .65    |
| Becoming a parent × age group (ref. = 3; 45–54 y.);<br>Becoming a parent × sex (ref. = women) | 3.76  | 1.18 | 3.18    | .002   |
| <i>Control variables</i>                                                                      |       |      |         |        |
| Sex (0 = male; 1 = female)                                                                    | 0.08  | 0.18 | 0.46    | .64    |
| Level of education (1–5)                                                                      | 0.03  | 0.07 | 0.47    | .64    |
| Previous activity duration (1–15)                                                             | −0.11 | 0.03 | −4.07   | < .001 |
| Quotient active years                                                                         | −0.49 | 0.52 | −0.95   | .34    |
| age group (ref. = 1; <30 y.)                                                                  |       |      |         |        |
| age group 2 (30–44 y.)                                                                        | −0.70 | 0.23 | −3.00   | .003   |
| age group 3 (45–54 y.)                                                                        | −0.71 | 0.23 | −3.14   | .002   |
| Time (ref. = 8)                                                                               |       |      |         |        |
| Time 1                                                                                        | 0.22  | 0.44 | 0.49    | .62    |
| Time 2                                                                                        | −0.09 | 0.48 | −1.8    | .86    |
| Time 3                                                                                        | 0.43  | 0.44 | 0.97    | .33    |
| Time 4                                                                                        | −0.58 | 0.54 | −1.07   | .29    |
| Time 5                                                                                        | −0.48 | 0.54 | −0.89   | .38    |
| Time 6                                                                                        | 0.39  | 0.44 | 0.89    | .37    |
| Time 7                                                                                        | 0.47  | 0.44 | 1.06    | .29    |
| Time 9                                                                                        | 0.19  | 0.48 | 0.39    | .69    |
| Time 10                                                                                       | 0.10  | 0.49 | 0.21    | .84    |
| Time 11                                                                                       | 0.74  | 0.44 | 1.68    | .09    |

|                |         |                 |           |       |     |
|----------------|---------|-----------------|-----------|-------|-----|
|                | Time 12 | 0.50            | 0.45      | 1.12  | .26 |
|                | Time 13 | 0.58            | 0.45      | 1.30  | .19 |
|                | Time 14 | 0.40            | 0.46      | 0.87  | .38 |
|                | Time 15 | −0.11           | 0.51      | −0.21 | .83 |
| Random effects |         | <i>Variance</i> | <i>SD</i> |       |     |
| Person         |         | 0.30            | 0.55      |       |     |

Note:  $N = 12689$  observations,  $n = 1388$  persons; SE = standard error, SD = standard deviation.

<sup>1</sup>To compare persons with and without experiencing a life event for a specific age group and sex, the reference category was changed to these values (Jaccard, 2001). The model and its values stays the same.

Supplementary Table S13: Multilevel discrete-time event-history analysis for **starting vocational training on terminating LTPA**. The model presented due to the best fit is calculated with the interaction effects for ending a relationship × age group, whereas the interaction with sex does not improve model fit.

| Fixed effects                                           | logit           | SE        | z value | P      |
|---------------------------------------------------------|-----------------|-----------|---------|--------|
| Intercept                                               | −10.09          | 2.17      | −4.65   | < .001 |
| Starting vocational training (15–44 years)              |                 |           |         |        |
| Starting voc. training × age group (ref. = 1; 30 y.)    | 0.17            | 0.43      |         | .68    |
| age group 2 (30–44 y.)                                  | 1.90            | 0.66      |         | .004   |
| <i>changing reference category<sup>1</sup></i>          |                 |           |         |        |
| Starting voc. training × age group (ref. = 2; 30–44 y.) | 2.07            | 0.51      | 4.05    | < .001 |
| <i>Control variables</i>                                |                 |           |         |        |
| Sex (0 = male; 1 = female)                              | 0.34            | 0.25      | 1.33    | .18    |
| Level of education (1–5)                                | 0.07            | 0.10      | 0.69.49 |        |
| Previous activity duration (1–15)                       | −0.04           | 0.04      | −1.08   | .28    |
| Quotient active years                                   | −2.23           | 0.82      | −2.73   | .006   |
| age group (ref. = 1; <30 y.)                            |                 |           |         |        |
| age group 2 (30–44 y.)                                  | −0.59           | 0.27      | −2.20   | .03    |
| Time (ref. = 8)                                         |                 |           |         |        |
| Time 1                                                  | 0.40            | 0.57      | 0.72    | .47    |
| Time 2                                                  | 0.15            | 0.61      | 0.24    | .81    |
| Time 3                                                  | 0.27            | 0.60      | 0.45    | .65    |
| Time 4                                                  | −0.31           | 0.69      | −0.45   | .65    |
| Time 5                                                  | −0.92           | 0.85      | −1.08   | .28    |
| Time 6                                                  | 0.46            | 0.60      | 0.77    | .44    |
| Time 7                                                  | 0.59            | 0.58      | 1.02    | .31    |
| Time 9                                                  | 0.25            | 0.66      | 0.38    | .70    |
| Time 10                                                 | −0.03           | 0.70      | −0.04   | .97    |
| Time 11                                                 | 0.79            | 0.60      | 1.32    | .19    |
| Time 12                                                 | 0.36            | 0.64      | 0.57    | .57    |
| Time 13                                                 | 0.90            | 0.58      | 1.54    | .12    |
| Time 14                                                 | 0.69            | 0.62      | 1.11    | .27    |
| Time 15                                                 | −0.01           | 0.70      | −0.01   | .99    |
| Random effects                                          | <i>Variance</i> | <i>SD</i> |         |        |
| Person                                                  | 0.87            | 0.93      |         |        |

Note: *N* = 5385 observations, *n* = 847 persons; SE = standard error, SD = standard deviation.

<sup>1</sup>To compare persons with and without experiencing a life event for a specific age group the reference category was changed to this value (Jaccard, 2001). The model and its values stays the same.

Supplementary Table S14: Multilevel discrete-time event-history analysis for **starting a job on terminating LTPA**. The model presented is calculated without interaction effects for the life event with gender and/or age groups, because this does not improve model fit.

| Fixed effects                     |                        | logit    | SE   | z value | P      |
|-----------------------------------|------------------------|----------|------|---------|--------|
| Intercept                         |                        | −5.49    | 1.10 | −4.98   | < .001 |
| Starting a job (15–70 years)      |                        | 0.02     | 0.26 |         | .93    |
| <i>Control variables</i>          |                        |          |      |         |        |
| Sex (0 = male; 1 = female)        |                        | 0.29     | 0.15 | 1.87    | .06    |
| Level of education (1–5)          |                        | −0.01    | 0.06 | −0.15   | .88    |
| Previous activity duration (1–15) |                        | −0.11    | 0.02 | −4.81   | < .001 |
| Quotient active years             |                        | −0.39    | 0.42 | −0.94   | .35    |
| age group (ref. = 1; <30 y.)      |                        |          |      |         |        |
|                                   | age group 2 (30–44 y.) | −0.37    | 0.21 | −1.74   | .08    |
|                                   | age group 3 (45–59 y.) | −0.72    | 0.20 | −3.49   | < .001 |
|                                   | age group 4 (60–70 y.) | −1.10    | 0.29 | −3.80   | < .001 |
| Time (ref. = 8)                   |                        |          |      |         |        |
|                                   | Time 1                 | 0.12     | 0.41 | 0.29    | .77    |
|                                   | Time 2                 | 0.01     | 0.42 | 0.01    | .99    |
|                                   | Time 3                 | 0.29     | 0.40 | 0.73    | .46    |
|                                   | Time 4                 | −0.53    | 0.49 | −1.09   | .27    |
|                                   | Time 5                 | −0.25    | 0.45 | −0.54   | .59    |
|                                   | Time 6                 | 0.44     | 0.39 | 1.13    | .26    |
|                                   | Time 7                 | 0.40     | 0.39 | 1.02    | .31    |
|                                   | Time 9                 | 0.01     | 0.43 | 0.03    | .98    |
|                                   | Time 10                | 0.24     | 0.41 | 0.59    | .55    |
|                                   | Time 11                | 0.69     | 0.38 | 1.83    | .07    |
|                                   | Time 12                | 0.40     | 0.39 | 1.02    | .31    |
|                                   | Time 13                | 0.34     | 0.40 | 0.85    | .40    |
|                                   | Time 14                | 0.51     | 0.39 | 1.32    | .19    |
|                                   | Time 15                | 0.26     | 0.40 | 0.65    | .52    |
| Random effects                    |                        | Variance |      | SD      |        |
| Person                            |                        | 0.24     | 0.49 |         |        |

Note:  $N = 19690$  observations,  $n = 1744$  persons; SE = standard error, SD = standard deviation; Time 16 had to be removed from the calculation because there are no terminations there.

Supplementary Table S15: Multilevel discrete-time event-history analysis for **ending a job on terminating LTPA**. The model presented is calculated without interaction effects for the life event with gender and/or age groups, because this does not improve model fit.

| Fixed effects                     | logit    | SE   | z value | P      |
|-----------------------------------|----------|------|---------|--------|
| Intercept                         | −5.59    | 1.12 | −5.01   | < .001 |
| Ending a job (15–70 years)        | 0.82     | 0.22 | 3.67    | < .001 |
| <i>Control variables</i>          |          |      |         |        |
| Sex (0 = male; 1 = female)        | 0.27     | 0.15 | 1.76    | .08    |
| Level of education (1–5)          | −0.01    | 0.06 | −0.23   | .82    |
| Previous activity duration (1–15) | −0.11    | 0.02 | −4.80   | < .001 |
| Quotient active years             | −0.39    | 0.42 | −0.93   | .35    |
| age group (ref. = 1; <30 y.)      |          |      |         |        |
| age group 2 (30–44 y.)            | −0.34    | 0.21 | −1.64   | .10    |
| age group 3 (45–59 y.)            | −0.67    | 0.20 | −3.29   | < .001 |
| age group 4 (60–70 y.)            | −0.96    | 0.29 | −3.35   | < .001 |
| Time (ref. = 8)                   |          |      |         |        |
| Time 1                            | 0.13     | 0.41 | 0.31    | .75    |
| Time 2                            | 0.01     | 0.42 | 0.02    | .98    |
| Time 3                            | 0.29     | 0.40 | 0.73    | .47    |
| Time 4                            | −0.52    | 0.49 | −1.06   | .29    |
| Time 5                            | −0.24    | 0.45 | −0.54   | .59    |
| Time 6                            | 0.44     | 0.39 | 1.14    | .25    |
| Time 7                            | 0.40     | 0.39 | 1.02    | .31    |
| Time 9                            | 0.01     | 0.43 | 0.02    | .98    |
| Time 10                           | 0.25     | 0.41 | 0.61    | .54    |
| Time 11                           | 0.68     | 0.38 | 1.80    | .07    |
| Time 12                           | 0.41     | 0.39 | 1.05    | .29    |
| Time 13                           | 0.31     | 0.40 | 0.77    | .44    |
| Time 14                           | 0.50     | 0.39 | 1.29    | .20    |
| Time 15                           | 0.21     | 0.41 | 0.52    | .60    |
| <hr/>                             |          |      |         |        |
| Random effects                    | Variance | SD   |         |        |
| Person                            | 0.28     | 0.53 |         |        |

Note:  $N = 19355$  observations,  $n = 1742$  persons; SE = standard error, SD = standard deviation; Time 16 had to be removed from the calculation because there are no terminations there.

Supplementary Table S16: Multilevel discrete-time event-history analysis for **retirement on terminating LTPA**. The model presented is calculated without interaction effects for the life event with gender and/or age groups, because this does not improve model fit.

| Fixed effects                     | logit    | SE   | z value | P      |
|-----------------------------------|----------|------|---------|--------|
| Intercept                         | −3.57    | 1.66 | −2.15   | .03    |
| Retirement (50–72 years)          | −0.36    | 0.74 | −0.49   | .62    |
| <i>Control variables</i>          |          |      |         |        |
| Sex (0 = male; 1 = female)        | 0.48     | 0.26 | 1.82    | .06    |
| Level of education (1–5)          | −0.12    | 0.10 | −1.20   | .23    |
| Previous activity duration (1–15) | −0.13    | 0.03 | 3.80    | < .001 |
| Quotient active years             | 0.68     | 0.62 | 1.08    | .28    |
| age group (ref. = 1; 50–59 y.)    |          |      |         |        |
| age group 4 (60–72 y.)            | −0.40    | 0.27 | −1.45   | .15    |
| Time (ref. = 8)                   |          |      |         |        |
| Time 1                            | −0.74    | 0.84 | −0.88   | .38    |
| Time 2                            | −0.07    | 0.68 | −0.10   | .92    |
| Time 3                            | −0.07    | 0.68 | −0.11   | .92    |
| Time 4                            | −1.53    | 1.10 | −1.40   | .16    |
| Time 5                            | 0.01     | 0.64 | 0.01    | .99    |
| Time 6                            | 0.34     | 0.59 | 0.58    | .56    |
| Time 7                            | 0.01     | 0.64 | 0.01    | .99    |
| Time 9                            | −0.97    | 0.84 | −1.16   | .25    |
| Time 10                           | 0.41     | 0.57 | 0.71    | .48    |
| Time 11                           | 0.39     | 0.58 | 0.68    | .50    |
| Time 12                           | −0.10    | 0.64 | −0.16   | .87    |
| Time 13                           | −0.60    | 0.73 | −0.82   | .41    |
| Time 14                           | 0.51     | 0.56 | 0.91    | .36    |
| Time 15                           | 0.46     | 0.58 | 0.79    | .43    |
| Random effects                    | Variance | SD   |         |        |
| Person                            | 0.15     | 0.38 |         |        |

Note:  $N = 10653$  observations,  $n = 1222$  persons; SE = standard error, SD = standard deviation; Time 16 had to be removed from the calculation because there are no terminations there.

Supplementary 17: Multilevel discrete-time event-history analysis for **simultaneously occurring life events on terminating LTPA**. The model presented due to the best fit is calculated with the interaction effects for simultaneously occurred life events × age group, whereas the interaction with sex does not improve model fit.

| Fixed effects                                                 | logit | SE   | z value | P      |
|---------------------------------------------------------------|-------|------|---------|--------|
| Intercept                                                     | −5.99 | 1.15 | −5.22   | < .001 |
| Simul. occurring life events (15–70 years)                    |       |      |         |        |
| Simul. occurring life events × age group (ref. = 1; <30 y.)   | 0.30  | 0.15 | 2.04    | .04    |
| age group 2 (30–44 y.)                                        | 0.53  | 0.21 | 2.50    | .01    |
| age group 3 (45–59 y.)                                        | −0.13 | 0.28 | −0.48   | .63    |
| age group 4 (60–70 y.)                                        | 0.09  | 0.47 | 0.20    | .84    |
| <i>changing reference category<sup>1</sup></i>                |       |      |         |        |
| Simul. occurring life events × age group (ref. = 2; 30–44 y.) | 0.83  | 0.15 | 5.39    | < .001 |
| Simul. occurring life events × age group (ref. = 3; 45–59 y.) | 0.17  | 0.24 | 0.71    | .48    |
| Simul. occurring life events × age group (ref. = 4; 60–70 y.) | 0.40  | 0.45 | 0.88    | .38    |
| <i>Control variables</i>                                      |       |      |         |        |
| Sex (0 = male; 1 = female)                                    | 0.31  | 0.15 | 2.03    | .04    |
| Level of education (1–5)                                      | −0.03 | 0.06 | −0.46   | .64    |
| Previous inactivity duration (1–15)                           | −0.10 | 0.02 | −4.23   | < .001 |
| Quotient active years                                         | −0.43 | 0.43 | −0.10   | .32    |
| age group (ref. = 1; <30 y.)                                  |       |      |         |        |
| age group 2 (30–44 y.)                                        | −0.50 | 0.26 | −1.89   | .06    |
| age group 3 (45–59 y.)                                        | −0.54 | 0.24 | −2.23   | .03    |
| age group 4 (60–70 y.)                                        | −1.15 | 0.30 | −3.83   | < .001 |
| Time (ref. = 8)                                               |       |      |         |        |
| Time 1                                                        | 0.23  | 0.42 | 0.54    | .59    |
| Time 2                                                        | 0.17  | 0.44 | 0.40    | .69    |
| Time 3                                                        | 0.46  | 0.41 | 1.12    | .26    |
| Time 4                                                        | −0.35 | 0.50 | −0.71   | .48    |
| Time 5                                                        | 0.11  | 0.44 | 0.25    | .80    |
| Time 6                                                        | 0.60  | 0.40 | 1.50    | .13    |
| Time 7                                                        | 0.62  | 0.40 | 1.55    | .12    |
| Time 9                                                        | 0.11  | 0.44 | 0.26    | .80    |
| Time 10                                                       | 0.33  | 0.42 | 0.80    | .43    |
| Time 11                                                       | 0.76  | 0.39 | 1.94    | .05    |
| Time 12                                                       | 0.59  | 0.40 | 1.48    | .14    |

|                |         |                 |           |      |     |
|----------------|---------|-----------------|-----------|------|-----|
|                | Time 13 | 0.53            | 0.40      | 1.31 | .19 |
|                | Time 14 | 0.63            | 0.40      | 1.59 | .11 |
|                | Time 15 | 0.39            | 0.41      | 0.95 | .34 |
| Random effects |         | <i>Variance</i> | <i>SD</i> |      |     |
| Person         |         | 0.39            | 0.62      |      |     |

Note: N = 21783 observations, n = 1743 persons; SE = standard error, SD = standard deviation.

<sup>1</sup>To compare persons with and without experiencing a life event within the age group, the reference category was changed to this age group (Jaccard, 2001). The model and its values stays the same; Time 16 had to be removed from the calculation because there are no terminations there.
